# Supplementary material for: Calcium Binding Mechanism of Soybean Peptide with Histidine Alteration by Molecular Docking Analysis and Spectroscopic Methods
Source: MDPI journal article supplement (doi:10.3390/foods11203290), 2022-10-20
Supplement: s1 [file s1]

## Supplementary Materials

**Table S1.** The procedures of absorption washing chambers.

| Transwell    | Procedures                               |                                       |                                    |
|--------------|------------------------------------------|---------------------------------------|------------------------------------|
| apical       | stop solution<br>0.5ml/each, three times | removal solution<br>0.5 ml/each, once | stop solution<br>0.5ml/each, twice |
| intermediate | 1 N NaOH 0.5 mL/each, twice              |                                       |                                    |
| basal        | stop solution 1.5mL/ each time, once     |                                       |                                    |

**Table S2.** LC-MS/MS- based identification of the simulated gastrointestinal digests of the CBP, CBP-H, CBP-calcium, CBP-H-calcium complex.

| Sequence            | Peptide      | Denovo Score | m/z      | Conf. (%) |
|---------------------|--------------|--------------|----------|-----------|
| Initial 1           | DEDEQIPSHPPR | 99           | 710.8283 | 99        |
| Initial 2           | DEDEQIPSLPPR | 99           | 710.8012 | 99        |
| Digestion product 1 | DEDEQIPSHPPR | 99           | 710.3239 | 99        |
| Digestion product 2 | DEDEQIPSLPPR | 99           | 710.7068 | 99        |
| Digestion product 3 | EDEQIPSHPPR  | 99           | 645.8048 | 99        |
| Digestion product 4 | DEQIPSLPPR   | 99           | 581.2893 | 99        |

**Table S3.** Sequence, Localization and physicochemical properties of CBP-H-calcium complexes.

| AA sequence  | -CDOCKER ENERGY | Name                                            | Distance | From             | To                            |
|--------------|-----------------|-------------------------------------------------|----------|------------------|-------------------------------|
| DEDEQIPSLPPR | 17.624          | Ca <sup>2+</sup> :DEDEQIP-SLPPR:O <sub>56</sub> | 2.76934  | Ca <sup>2+</sup> | DEDEQIPSLPPR:O <sub>56</sub>  |
|              |                 | Ca <sup>2+</sup> :DEDEQIP-SLPPR:O <sub>92</sub> | 2.74928  | Ca <sup>2+</sup> | DEDEQIPSLPPR:O <sub>92</sub>  |
| DEDEQIPSHPPR | 23.2059         | Ca <sup>2+</sup> :DEDEQIP-SHPPR:O <sub>56</sub> | 2.56309  | Ca <sup>2+</sup> | DEDEQIPSHPPR:O <sub>56</sub>  |
|              |                 | Ca <sup>2+</sup> :DEDEQIP-SHPPR:O <sub>92</sub> | 2.60394  | Ca <sup>2+</sup> | DEDEQIPSHPPR:O <sub>92</sub>  |
| DEDEQIPHHPPR | 21.8751         | Ca <sup>2+</sup> :DEDE-QIPHHPPR:O <sub>56</sub> | 2.50702  | Ca <sup>2+</sup> | DEDEQIPHHPPR:O <sub>56</sub>  |
|              |                 | Ca <sup>2+</sup> :DEDE-QIPHHPPR:O <sub>92</sub> | 2.55158  | Ca <sup>2+</sup> | DEDEQIPHHPPR:O <sub>92</sub>  |
| DEDHQIPSHPPR | 12.3839         | Ca <sup>2+</sup> :DEDHQIPHHPPR:O <sub>70</sub>  | 2.48884  | Ca <sup>2+</sup> | DEDHQIPHHPPR:O <sub>70</sub>  |
| DHDHQIPSHPPR | 15.8871         | Ca <sup>2+</sup> :DHDHQIPHHPPR:O <sub>96</sub>  | 2.57541  | Ca <sup>2+</sup> | DHDHQIPHHPPR:O <sub>96</sub>  |
|              |                 | Ca <sup>2+</sup> :DHDHQIPHHPPR:O <sub>121</sub> | 2.6225   | Ca <sup>2+</sup> | DHDHQIPHHPPR:O <sub>121</sub> |

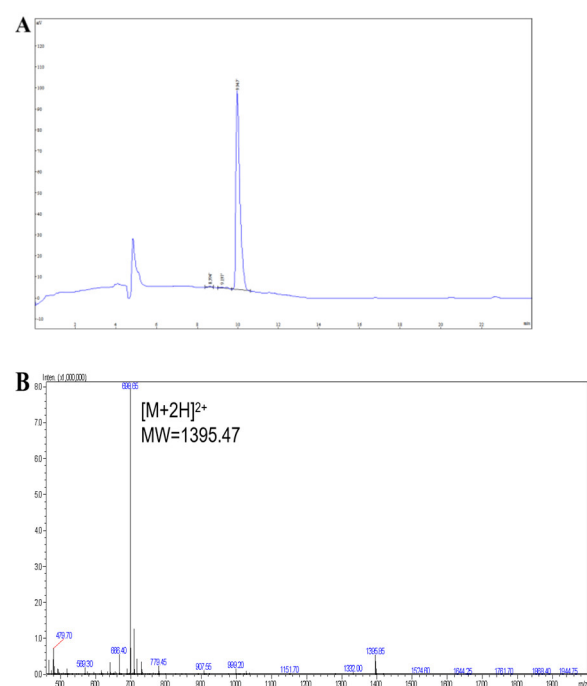

**Figure S1.** Identifications of CBP-H by HPLC-MS. **(A):** The MS spectrum of CBP-H. **(B):** The MS/MS spectrum of CBP-H.

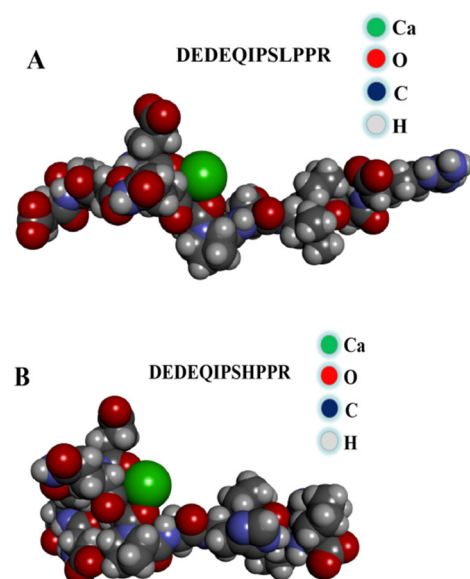

**Figure S2.** Docking calculations for the interaction of soybean peptide **(A):** CBP-H. **(B):** CBP with  $\text{Ca}^{2+}$ .
